# Supplementary material for: Effect of Properties of Silver Nanoparticles Coated with Polar Material and the Antibacterial Activity on Marine Pathogenic Bacteria
Source: Hindawi journal article supplement (doi:10.1155/2020/1728305), 2020-11-24
Supplement: f1 [file 1728305.f1.docx]

**Supporting information**

## Effect of Properties of Silver Nanoparticles Coated by Polar Material and the Antibacterial Activity for Marine Pathogenic Bacteria

Yanli Feng, Tian Deng, Xiaohua Lai, Zhihua Feng, Shujun Wang, Mingsheng Lyu

**Results**


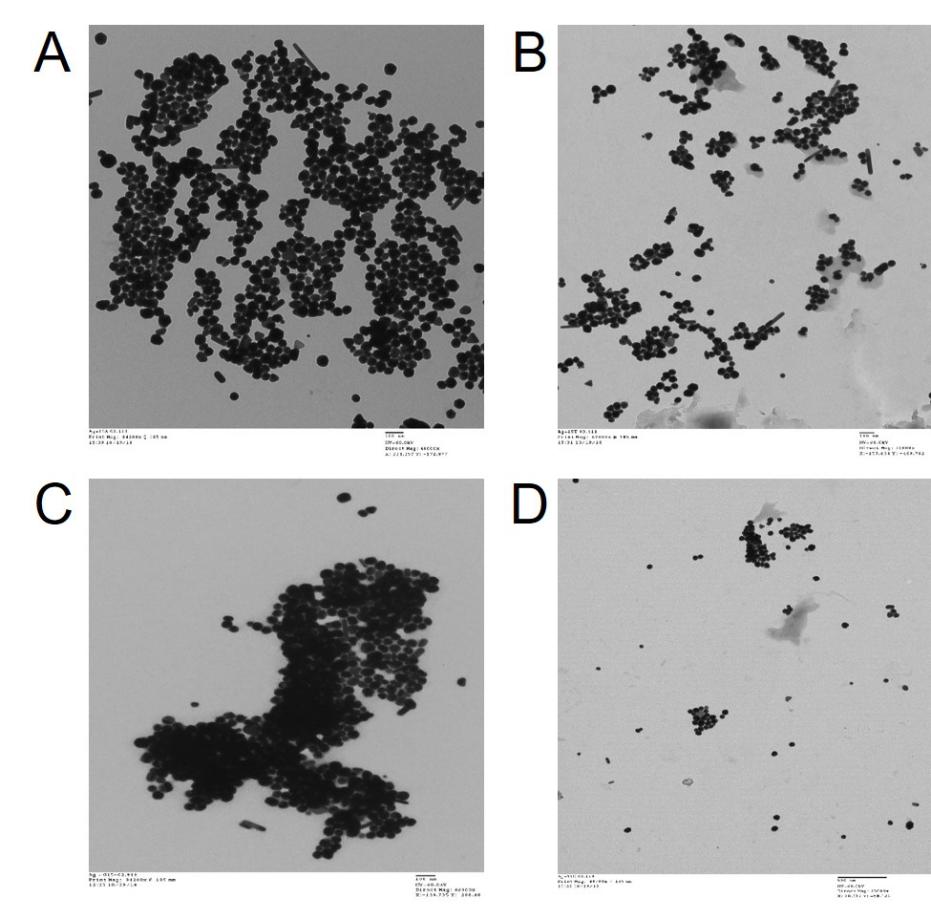


Figure S1. Transmission electron microscopy of four kinds of DNA adsorbed by Ag NPs.

1. FAM-A15+Ag NPs; (B) FAM-T15+Ag; (C) FAM-C15+Ag and (D) FAM-G15+Ag.

| 1.  |
| --- |

Figure S2 The effect of DNA desorption with Ag NPs by various concentrations of phosphate buffer. (A) FAM-A15, (B) FAM-T15, (C) FAM-C15 and (D) FAM-G15.

|  |
| --- |

Figure S3 The effect of DNA desorption with Ag NPs by various concentrations of adenine solution. (A) FAM-A15, (B) FAM-T15, (C) FAM-C15 and (D) FAM-G15.

|  |
| --- |

Figure S4 The effect of DNA desorption with Ag NPs by various concentrations of thymine solution. (A) FAM-A15, (B) FAM-T15, (C) FAM-C15 and (D) FAM-G15.

|  |
| --- |

Figure S5 The effect of DNA desorption with Ag NPs by different concentration of guanine solution. (A) FAM-A15, (B) FAM-T15, (C) FAM-C15 and (D) FAM-G15.

Table S1 Antibacterial activity of silver Ag NPs against different strains

| Strains | Ag NPs concentration | Reference |
| --- | --- | --- |
| *B. megaterium* and *Pseudomona aeruginosa* | 100 μg/mL((0.93 mM)) | [[1](#_ENREF_1)] |
| *Escherichia coli* | 35 μg/mL(0.33 mM) | [[2](#_ENREF_2)] |
| *E. coli* and *P. aeruginosa*, and *Staphylococcus aureus* | 6.74 μg/mL (minimum) (0.062 mM) | [[3](#_ENREF_3)] |
| *E. coli* and *Enterococcus Faecium* | 1000 μg/mL(9.3 mM) | [[4](#_ENREF_4)] |
| *E. coli* | 0.312 mg/mL(0.0029 mM) | [[5](#_ENREF_5)] |
| *E. coli* | 5 μg/mL(0.047 mM) | [[6](#_ENREF_6)] |
| *Staphylococcus aureus* and  *E. coli* | 50 mg/mL(0.47 mM) | [[7](#_ENREF_7)] |
| *E. coli* | 80 μg/mL(0.074 mM) | [[8](#_ENREF_8)] |
| The bacterial fish pathogens | 5 μg/mL(0.047 mM) | [[9](#_ENREF_9)] |
| *E. coli* | 10 μg/mL(0.093 mM) | [[10](#_ENREF_10)] |
| *E. coli* | 2 μg/mL(0.019 mM) | [[11](#_ENREF_11)] |
| *E. coli* and  *P. aeruginosa* | 100 μg/mL(0.93 mM)  10 μg/mL(0.093 mM) | [[12](#_ENREF_12)] |

**Reference**

1. Anuj S A , Gajera H P , Hirpara D G , et al. Bactericidal assessment of nano-silver on emerging and re-emerging human pathogens[J]. Journal of Trace Elements in Medicine & Biology, 2019, 51:219-225.
2. Pham, Van, Viet, et al. An improved green synthesis method and *Escherichia coli* antibacterial activity of silver nanoparticles[J]. Journal of Photochemistry and Photobiology, B. Biology, 2018, 182:108-114.
3. M. Guzman, J. Dille, S. Godet, Synthesis and antibacterial activity of silver nanoparticles against gram-positive and gram-negative bacteria[J]. Nanomedicine: NBM, 2012, 8:37-45.
4. Alshareef A , Laird K , Cross R B M . Shape-dependent antibacterial activity of silver nanoparticles on *Escherichia coli* and *Enterococcus faecium* bacterium[J]. Applied Surface Science, 2017, 03(176):1-6.
5. D'Andrea A , Atul C , Brandi B , et al. Evaluation of E. coli inhibition by plain and polymer-coated silver nanoparticles[J]. Revista Do Instituto De Medicina Tropical De So Paulo, 2018, 60:1-11.
6. Yoojin Choi, HyunA Kim, KyoungWoong Kim, et al. Comparative toxicity of silver nanoparticles and silver ions to *Escherichia coli*[J]. Journal of Environmental Sciences, 2018 66(4):50-60.
7. Gomaa E Z . Silver nanoparticles as an antimicrobial agent: A case study on *Staphylococcus aureus* and *Escherichia coli* as models for Gram-positive and Gram-negative bacteria[J]. Journal of General & Applied Microbiology, 2017, 63(1):36-43.
8. Haque M A , Imamura R , Brown G A , et al. An experiment-based model quantifying antimicrobial activity of silver nanoparticles on *Escherichia coli*[J]. RSC Advances, 2017, 7(89):56173-56182.
9. Soltani . M, Ghodratnema . M, Ahari . H, et al. The inhibitory effect of silver nanoparticles on the bacterial fish pathogens, *Streptococcus iniae*, *Lactococcusgarvieae*, *Yersinia ruckeri* and *Aeromonashydrophila*[J]. International Journal of Veterinary Research, 2009, 3(2):137-142.
10. Li W R , Xie X B , Shi Q S , et al. Antibacterial activity and mechanism of silver nanoparticles on *Escherichia coli*[J]. Applied Microbiology and Biotechnology, 2010, 85(4):1115-1122.
11. Lee W , Kim K J , Lee D G . A novel mechanism for the antibacterial effect of silver nanoparticles on *Escherichia coli*[J]. Biometals, 2014, 27(6):1191-1201.
12. Priester J H , Singhal A , Wu B , et al. Integrated approach to evaluating the toxicity of novel cysteine-capped silver nanoparticles to *Escherichia coli* and *Pseudomonas aeruginosa*[J]. Analyst, 2014, 139:954-963.
